# Supplementary material
Source: publisher figshare collection journal article supplement (https://acs.figshare.com/ndownloader/files/3871111)
Supplement: Supplementary file 1 [file 3871111]

## **Supplementary Materials**

### **Incorporation of Pentacyclic Triterpenes Into Mitochondrial Membrane - Studies on the Interactions in Model 2D Lipid Systems**

Michał Flasiński\*, Katarzyna Hąc-Wydro and Marcin Broniatowski

Department of Environmental Chemistry, Faculty of Chemistry, Jagiellonian University,  
Gronostajowa 3, 30-387 Kraków, Poland

\* corresponding author (M. Flasiński)

e-mail: [flasinsk@chemia.uj.edu.pl](mailto:flasinsk@chemia.uj.edu.pl)

Fax: +48 0-12-634-05-15

Phone: +48 0-12-664-67-97

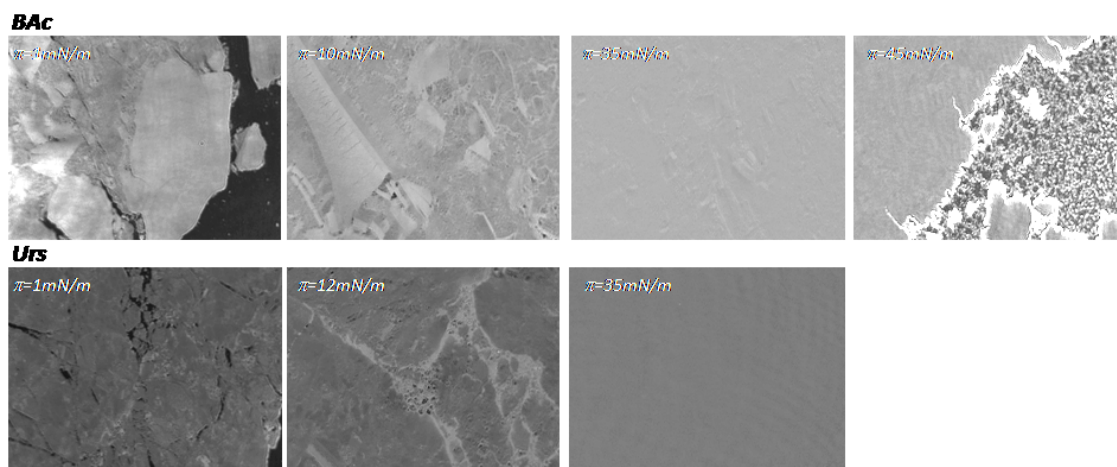

**Fig. S1.** BAM images taken for monolayers of betulinic acid and ursolic acid at surface pressures indicated in the left top corner of the photos. In contrast to these surface films, monolayer of  $\alpha$ -amyirin was homogenous at the whole range of surface pressure (images not shown).

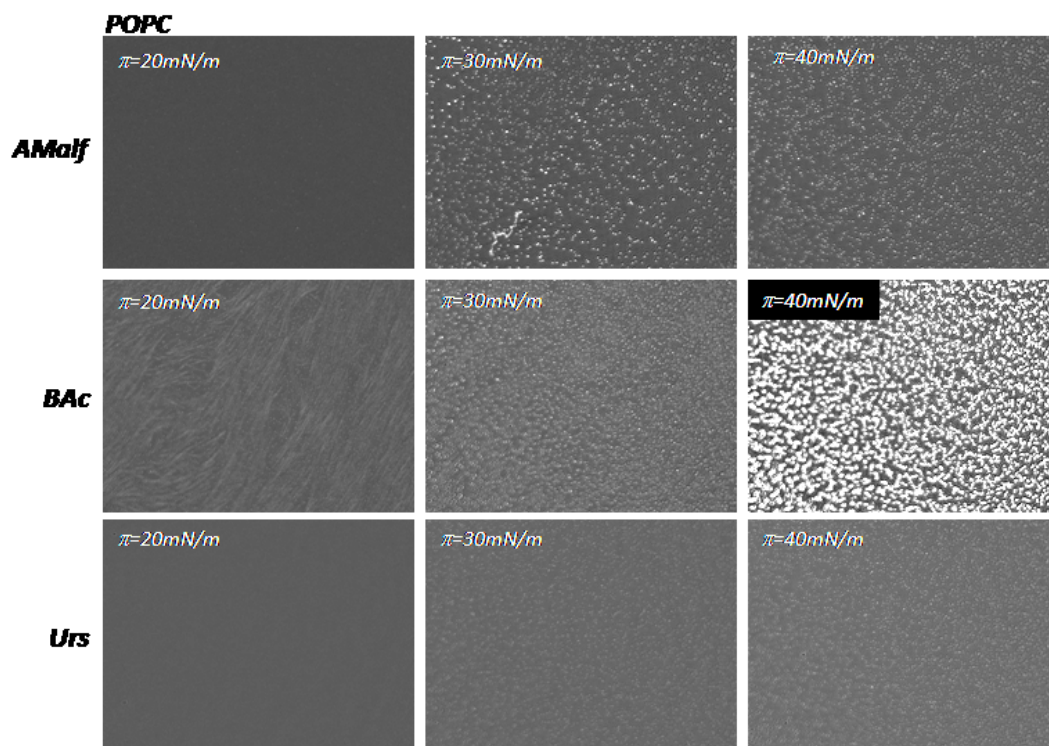

**Fig. S2.** BAM images for two component monolayers of triterpenes (30%) and POPE (70%) taken at surface pressures indicated in the left top corner of the photos.

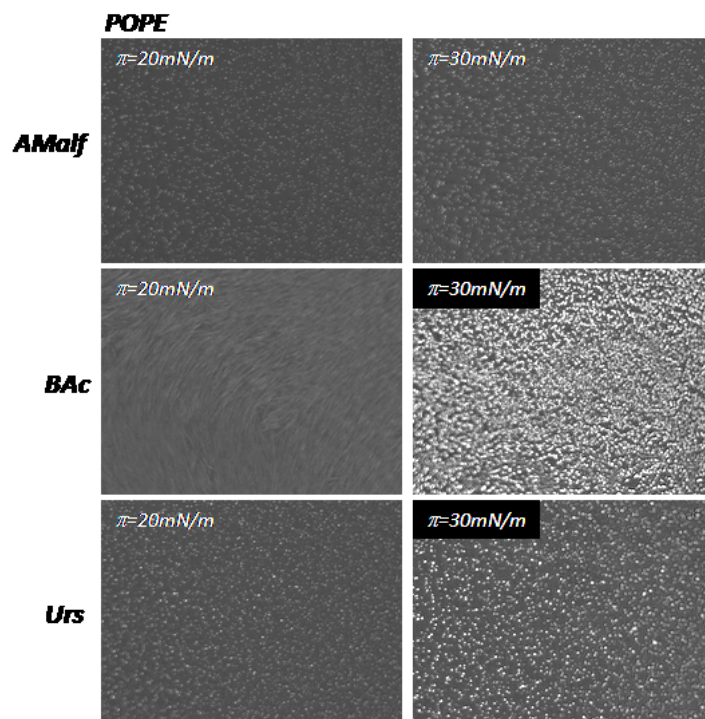

**Fig. S3.** BAM images for two component monolayers of triterpenes (30%) and POPE (70%) taken at surface pressures indicated in the left top corner of the photos.
